# Supplementary material for: Target-Guided Isolation of Progenitors of 1,1,6-Trimethyl-1,2-dihydronaphthalene (TDN) from Riesling Wine by High-Performance Countercurrent Chromatography
Source: MDPI journal article supplement (doi:10.3390/molecules27175378), 2022-08-23
Supplement: s1 [file s1]

# Supplementary Material

## Target-Guided Isolation of Progenitors of 1,1,6-Trimethyl-1,2-dihydronaphthalene (TDN) from Riesling Wine by High-Performance Countercurrent Chromatography <sup>†</sup>

Recep Gök <sup>1,\*</sup>, Pia Selhorst <sup>1</sup>, Mats Kiene <sup>1</sup>, Theresa Noske <sup>1</sup>, Michael Ziegler <sup>2</sup>, Ulrich Fischer <sup>2</sup> and Peter Winterhalter <sup>1,\*</sup>

<sup>1</sup> Institute of Food Chemistry, Technische Universität Braunschweig, Schleinitzstrasse 20, 38106 Braunschweig, Germany; p.selhorst@tu-braunschweig.de (P.S.); m.kiene@tu-braunschweig.de (M.K.); t.noske@outlook.com (T.N.)

<sup>2</sup> Institute for Viticulture and Oenology, Dienstleistungszentrum Ländlicher Raum (DLR) Rheinpfalz, 67435 Neustadt an der Weinstraße, Germany; michael.ziegler@dlr.rlp.de (M.Z.); ulrich.fischer@dlr.rlp.de (U.F.)

\* Correspondence: r.goek@tu-braunschweig.de (R.G.); p.winterhalter@tu-braunschweig.de (P.W.)

<sup>†</sup> In memoriam of Dr. phil. nat. habil. Hans-Georg Schmarr (1961–2019).

### Solvent system prediction for countercurrent chromatography

**Table S1.** Investigated CCC solvent systems for Amberlite® XAD®-2 extract of Riesling wine [Ito, Y. 2005]

| #  | Solvent system                                                        | Composition (v/v/v/v) | Remarks                 |
|----|-----------------------------------------------------------------------|-----------------------|-------------------------|
| 1  | <i>n</i> -Hexane/Ethyl acetate/Methanol/Water                         | 3:5:3:5               |                         |
| 2  | <i>n</i> -Hexane/Ethyl acetate/Methanol/Water                         | 5:5:5:5               |                         |
| 3  | <i>n</i> -Hexane/Ethyl acetate/Methanol/Water                         | 7:3:5:5               |                         |
| 4  | <i>n</i> -Hexane/Ethyl acetate/Methanol/Water                         | 1:5:1:5               |                         |
| 5  | <i>n</i> -Hexane/Ethyl acetate/Methanol/Water                         | 0:5:0:5               |                         |
| 6  | Chloroform/Methanol/Water                                             | 7:13:8                | Original solvent system |
| 7  | Dichlormethane/Methanol/Water                                         | 7:13:8                |                         |
| 8  | <i>n</i> -Butanol/Water                                               | 1:1                   | Promising               |
| 9  | <i>n</i> -Hexane/Ethyl acetate/Methanol/Water                         | 7:3:7:3               |                         |
| 10 | <i>tert</i> -Butyl methyl ether/Acetonitrile/Water                    | 6:3:8                 | Promising               |
| 11 | <i>tert</i> -Butyl methyl ether/Water                                 | 1:1                   |                         |
| 12 | <i>tert</i> -Butyl methyl ether/ <i>n</i> -Butanol/Acetonitrile/Water | 2:2:1:5               | Selected solvent system |

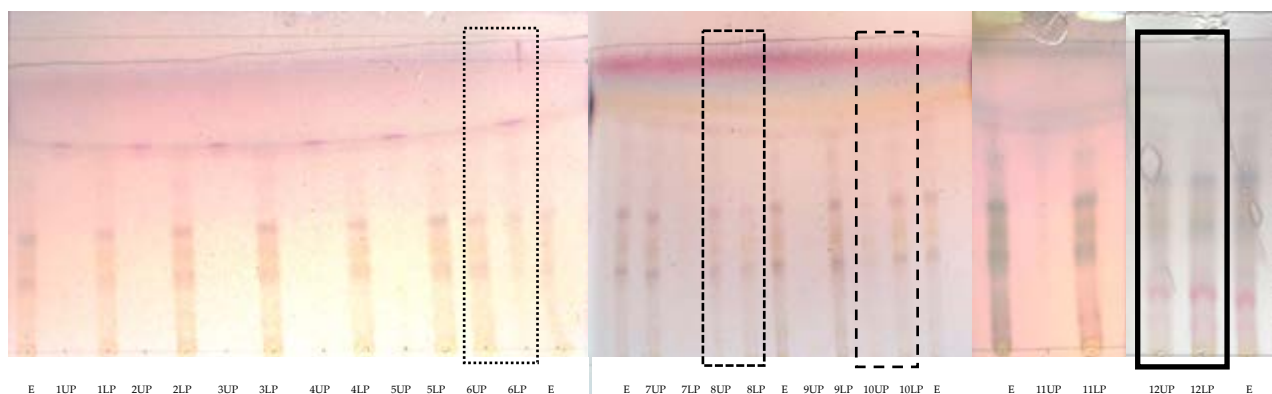

**Figure S1.** TLC analysis of the suitable solvent system prediction experiments; distributions in the phase layers of shakeflask experiments upper phase UP – lower phase LP, crude extract E [Ito, Y. 2005]. Normal phase silica gel TLC plates were developed with Ethyl acetate/Methanol/Water 75:25:5 (v/v/v). Visualization was done using anisaldehyde–sulfuric acid–glacial acetic acid universal reagent [Stahl, E. and Kaltenbach, U. 1961].

## TLC screening of CCC fractions (exemplary)

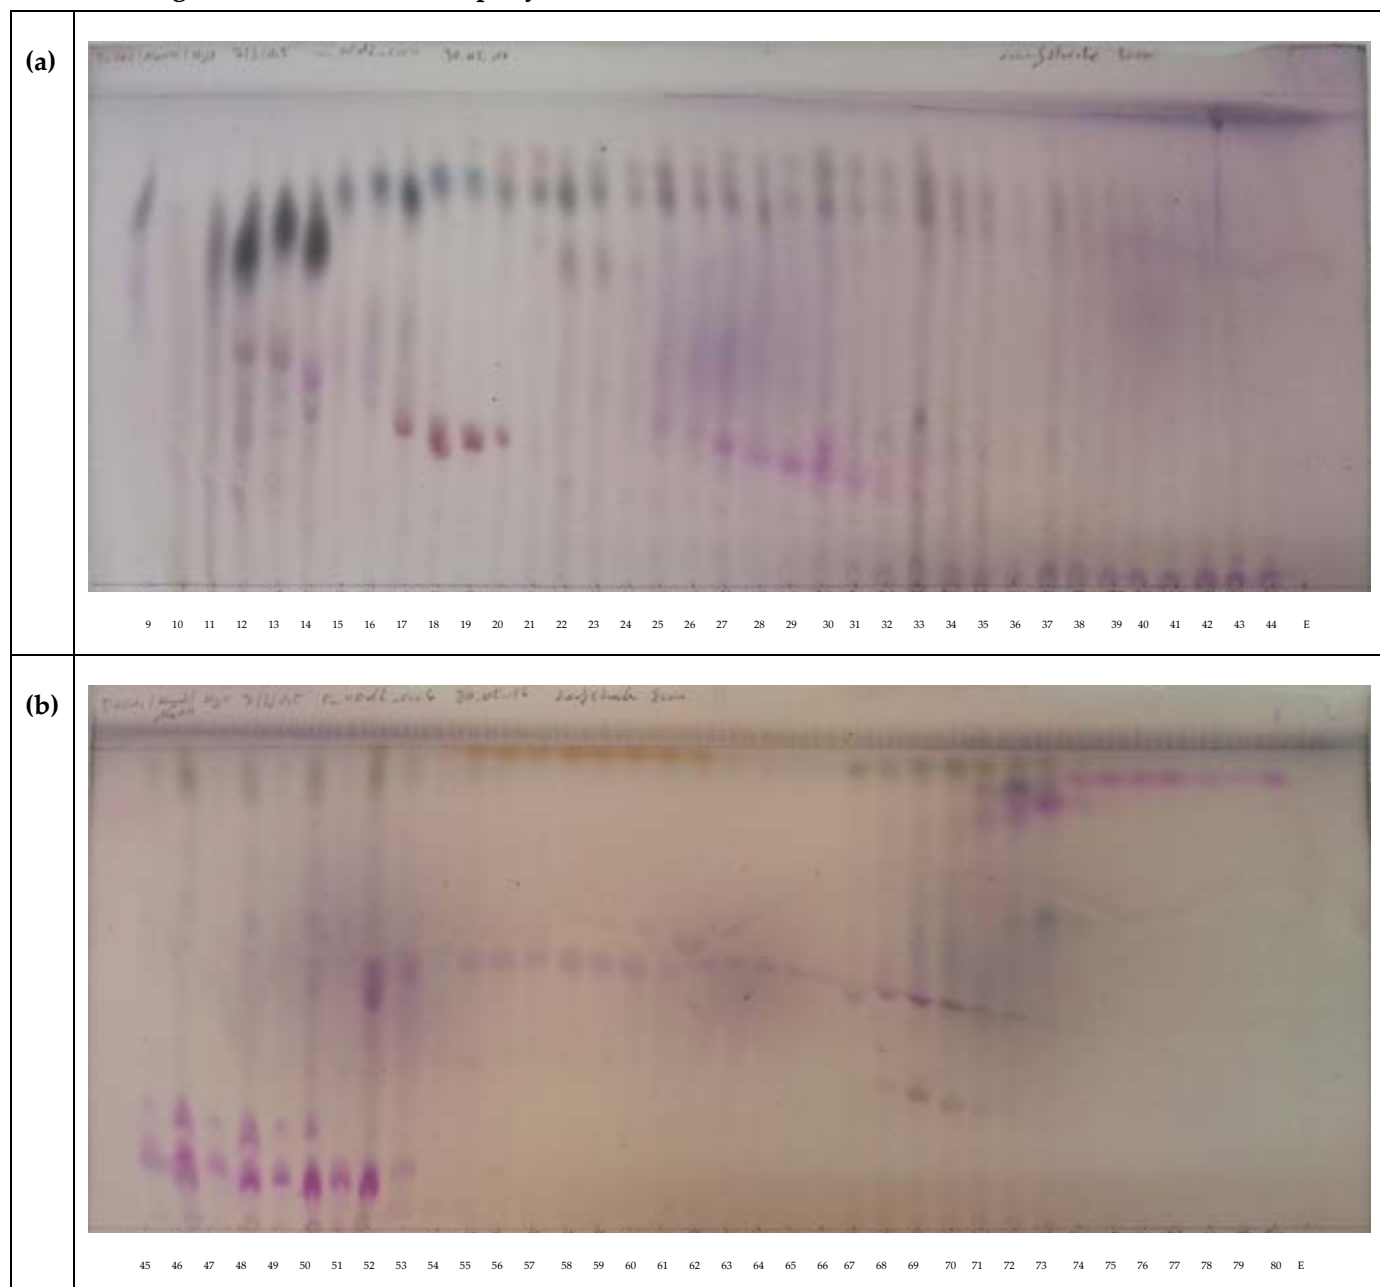

**Figure S2.** TLC analysis of the CCC fractions; a) fractions 9 – 44 b) fractions 45 – 80. Normal phase silica gel TLC plates were developed with Ethyl acetate/Methanol/Water 7:3:0.5 (v/v/v). Visualization was done using anisaldehyde–sulfuric acid–glacial acetic acid universal reagent. [Stahl, E. and Kaltenbach, U. 1961]

### Stability of deuterated TDN for HS-GC-MS/MS-Screening method for generated fractions

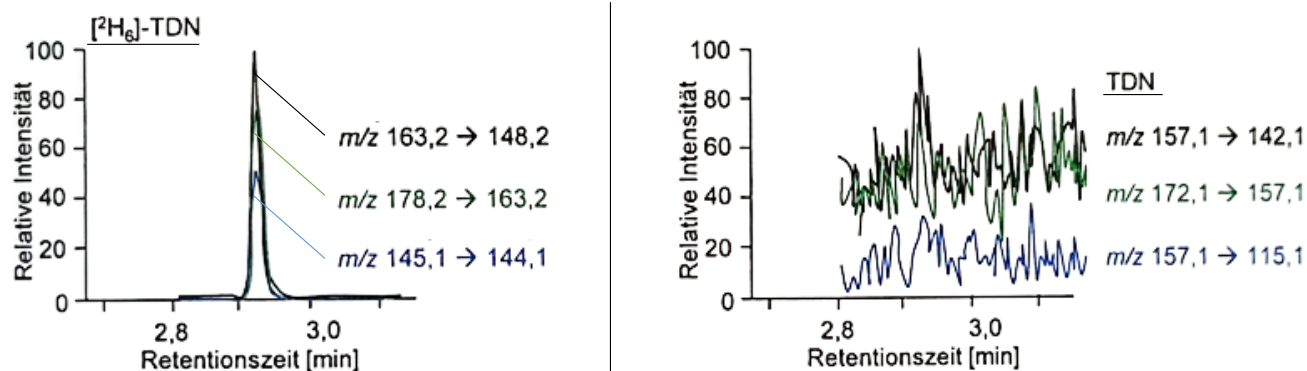

Figure S3. Stability of deuterated TDN under hydrolysis conditions.

## Calculation of countercurrent chromatographic separation parameters

The chromatographic elution time was converted over *elution/retention volumes*  $V_R$  into their respective *partition ratio* values  $K_D$  (cf. equations 1-7). The experimental  $V_R$  values of screened fractions (HS-GC-MS/MS-Screening) were calculated with equation 1.

$$\text{Retention volume } V_R = \text{elution time [min]} \times \text{flow rate [mL/ min]} \quad (1)$$

The  $S_F$  values of the used solvent systems were determined by equation 2a-b using  $V_C$  (125 mL), and  $V_M$  resulting in the  $S_F$  value measured at the hydrodynamic equilibrium.

$$V_S = (V_C - V_M) \quad (2a)$$

$$S_F = V_S / V_C \times 100\% \quad (2b)$$

$$S_F = 67.2\%$$

$V_S$ : retained experimental stationary phase volume

$V_C$ : CCC column volume/capacity (200 mL)

$V_M$ : volume of mobile phase take up to the coil at equilibrium of CCC

$V_{CM}$ : volume with change of elution to extrusion-mode (*switch volume*)

$S_F$ : stationary phase retention

$K_D$ : partition ratio

The determined  $S_F$ -value in the experiment is corrected by the *extra column volume*  $V_{Ext}$  (6 mL) of the connecting periphery tubing in the CCC set-up, using equations 3-5

$$\text{Corrected } V_M = V_M - V_{ext} \quad (3)$$

$$\text{corr. } V_M = 41 \text{ mL} - 6 \text{ mL} = 35 \text{ mL}$$

$$\text{Corrected } V_S = V_C - \text{corrected } V_M \quad (4)$$

$$\text{corr. } V_S = 125 \text{ mL} - 35 \text{ mL} = 90 \text{ mL}$$

$$\text{corrected } S_F = \text{corrected } V_S / V_C \quad (5)$$

$$\text{corr. } S_F = 90 \text{ mL} / 125 \text{ mL} \times 100\% = 72\%$$

A high  $S_F$  value directly correlate to a higher resolution and efficiency of the CCC-separation.

The solvent system specific partition ratio  $K_D$  values in the CCC run were calculated by the equations (6) (results cf. Figure 2). [Berthod et al. 2007]

During *elution-mode*:

$$K_D = (V_R - \text{corrected } V_M) / \text{corrected } V_S \quad (6)$$

The calculation of the **separation factor**  $\alpha$  based on the  $K_D$  values:

$$\alpha = K_{D2} / K_{D1} \text{ (with } K_{D2} > K_{D1}) \quad (7)$$

## ESI-MS/MS and NMR Data of isolated compounds

Table S2. ESI-MS/MS data of isolated compounds (3b and 3c).

| <i>comp.</i> | <i>Mw</i><br>[g/mol] | <i>ESI</i><br><i>polarity</i> | <i>pseudo</i><br><i>molecular ion</i>              | <i>parent ion</i><br><i>m/z</i> | <i>m/z from MS<sup>2</sup></i> <sup>a</sup>                                                                        |
|--------------|----------------------|-------------------------------|----------------------------------------------------|---------------------------------|--------------------------------------------------------------------------------------------------------------------|
| <b>3b</b>    | 388                  | +                             | [M+NH <sub>4</sub> ] <sup>+</sup>                  | 406                             | 371(91), 353(14), 209(42), <u>191(100)</u> , 173(45), 151(26), 133(38)                                             |
|              |                      |                               | [M-H <sub>2</sub> O+H] <sup>+</sup>                | 371                             | 209(26), <u>191(100)</u> , 173(98), 133(50)                                                                        |
|              |                      | -                             | [M-H] <sup>-</sup>                                 | 387                             | 225(16), 207(10), 189(7), <u>161(100)</u>                                                                          |
|              |                      |                               | [M+CH <sub>2</sub> O <sub>2</sub> -H] <sup>-</sup> | 433                             | 388(16), <u>387(100)</u> , 224(16), 161(5)                                                                         |
| <b>3c</b>    | 534                  | +                             | [M-H <sub>2</sub> O+H] <sup>+</sup>                | 517                             | 371(5), 319(6), 271(9), 261(8), 209(22), 192(7), 191(14), 190(5), 177(5), 174(7), <u>173(100)</u> , 171(5), 157(5) |
|              |                      | -                             | [M+2H <sub>2</sub> O-H] <sup>-</sup>               | 569                             | 534(18), <u>533(100)</u> , 389(3), 387(25), 163(4)                                                                 |

<sup>a</sup> Base peaks are underlined, brackets show the relative intensity

**Table S3.** NMR data of 3,4-dihydroxy-7,8-dihydro- $\beta$ -ionone 3-O- $\beta$ -D-glucopyranoside (**3b**).<sup>a</sup>

| Position <sup>b</sup> | $\delta_C$ ppm (CH <sub>n</sub> ) | $\delta_H$ ppm; mult., $J$ Hz <sup>c</sup>                   | HMBC <sup>d</sup>                 |
|-----------------------|-----------------------------------|--------------------------------------------------------------|-----------------------------------|
| 1                     | 38.9 (C <sub>q</sub> )            |                                                              |                                   |
| 2                     | 40.1 (CH <sub>2</sub> )           | 1.55 (a); ddd $J=1.5/3.6/12.4$ Hz<br>1.85 (b); t $J=12.7$ Hz | (a) 1,3,4,6,11<br>(b) 1,3,4,11,12 |
| 3                     | 76.1 (CH)                         | 3.93; dt $J=3.7/12.9$ Hz                                     | 1,2,4,1'                          |
| 4                     | 70.4 (CH)                         | 3.99; m                                                      | 2,3,5,6,13                        |
| 5                     | 128.1 (C <sub>q</sub> )           |                                                              |                                   |
| 6                     | 143.3 (C <sub>q</sub> )           |                                                              |                                   |
| 7                     | 23.1 (CH <sub>2</sub> )           | 2.20-2.33; m                                                 | 1,5,6,8,9                         |
| 8                     | 44.3 (CH <sub>2</sub> )           | 2.57; t(br) $J=8.3$ Hz                                       | 6,7,9                             |
| 9                     | 211.1 (C <sub>q</sub> )           |                                                              |                                   |
| 10                    | 29.7 (CH <sub>3</sub> )           | 2.14; s                                                      | 8,9                               |
| 11                    | 27.6 (CH <sub>3</sub> )           | 1.06; s                                                      | 1,2,6,12                          |
| 12                    | 29.6 (CH <sub>3</sub> )           | 1.05; s                                                      | 1,2,6,11                          |
| 13                    | 18.4 (CH <sub>3</sub> )           | 1.75; s                                                      | 4,5,6                             |
| 1'                    | 102.7 (CH)                        | 4.48; d $J=7.8$ Hz                                           | 3,3'                              |
| 2'                    | 75.4 (CH)                         | 3.21; dd $J=7.8/9.2$ Hz                                      | 1',3'                             |
| 3'                    | 78.0 (CH)                         | 3.36-3.39; m                                                 | 1',2',4',5'                       |
| 4'                    | 71.6 (CH)                         | 3.28-3.30; m                                                 | 4',6'                             |
| 5'                    | 78.1 (CH)                         | 3.28-3.30; m                                                 | 1',4',6'                          |
| 6'                    | 62.7 (CH <sub>2</sub> )           | 3.65-3.68 (a)<br>3.84-3.87 (b)                               | (a) 4',5'<br>(b) 4',5'            |

<sup>a</sup> Solvent: CD<sub>3</sub>OD; tetramethylsilane ( $\delta = 0.00$  ppm) for <sup>1</sup>H, CD<sub>3</sub>OD ( $\delta = 49.00$  ppm) for <sup>13</sup>C; <sup>1</sup>H observation frequency 600.1 MHz.

<sup>b</sup> For numbering of the carbon atoms, see the formula, assignment of C-H via HSQC data..

<sup>c</sup> For CH<sub>2</sub> groups with diastereotopic protons a and b indicate the deshielded and shielded nucleus, respectively.

<sup>d</sup> Entries in the column HMBC indicate <sup>1</sup>H nuclei showing long-range correlations (<sup>2,3</sup> $J$ ) with the <sup>13</sup>C chemical shift in the second column.

n hydrogen number

q quarternary carbon

(br) broad signal

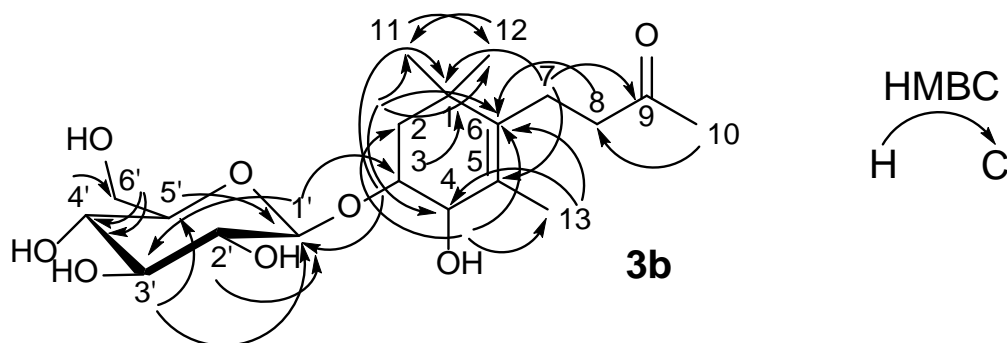**Figure S4.** Structure relevant long-range HC-correlation signals observed in the HMBC of **3b**

**Table S4.** NMR data of 3,4-dihydroxy-7,8-dihydro- $\beta$ -ionone 3-*O*-rutinoside (**3c**).<sup>a</sup>

| Position <sup>b</sup> | $\delta_C$ ppm (CH <sub>n</sub> ) | $\delta_H$ ppm; mult., J Hz <sup>c</sup>   | HMBC <sup>d</sup>                |
|-----------------------|-----------------------------------|--------------------------------------------|----------------------------------|
| 1                     | 39.0 (C <sub>q</sub> )            |                                            |                                  |
| 2                     | 40.4 (CH <sub>2</sub> )           | 1.53-1.57 (a); m<br>1.87 (b); t, J=12.9 Hz | (a) 1,3,4,6<br>(b) 1,3,4,6,11,12 |
| 3                     | 76.5 (CH)                         | 3.83-3.89; m                               | 2,1'                             |
| 4                     | 70.7 (CH)                         | 3.95-3.99; m                               | 2,3,5,6,13                       |
| 5                     | 128.2 (C <sub>q</sub> )           |                                            |                                  |
| 6                     | 143.3 (C <sub>q</sub> )           |                                            |                                  |
| 7                     | 23.1 (CH <sub>2</sub> )           | 2.18-2.33; m                               | 1,5,6,8,9                        |
| 8                     | 44.3 (CH <sub>2</sub> )           | 2.58; t, J=8.3 Hz                          | 6,7,9                            |
| 9                     | 211.4 (C <sub>q</sub> )           |                                            |                                  |
| 10                    | 29.7 (CH <sub>3</sub> )           | 2.14; s                                    | 8                                |
| 11                    | 27.7 (CH <sub>3</sub> )           | 1.07; s                                    | 1,2,6,12                         |
| 12                    | 29.6 (CH <sub>3</sub> )           | 1.05; s                                    | 1,2,6,11                         |
| 13                    | 18.3 (CH <sub>3</sub> )           | 1.75; s                                    | 4,5,6                            |
| 1'                    | 103.2 (CH)                        | 4.44; d, J=7.9 Hz                          | 3'                               |
| 2'                    | 75.3 (CH)                         | 3.18-3.23; m                               | 3',4'                            |
| 3'                    | 77.9 (CH)                         | 3.34-3.38; m                               | 1',2',4'                         |
| 4'                    | 71.6 (CH)                         | 3.27-3.33; m                               | 3',5',6'                         |
| 5'                    | 76.8 (CH)                         | 3.39-3.43; m                               | 3',4',6'                         |
| 6'                    | 68.0 (CH <sub>2</sub> )           | 3.56-3.60 (a); m<br>3.95-3.99 (b); m       | (a) 5',1''<br>(b) 4',5',1''      |
| 1''                   | 102.1 (CH)                        | 4.71; d, J=1.7 Hz                          | 6',2'',3''                       |
| 2''                   | 72.4 (CH)                         | 3.62-3.66; m                               | 3''                              |
| 3''                   | 72.2 (CH)                         | 3.81; dd, J=1.74/3.47 Hz                   | 1'',4''                          |
| 4''                   | 74.1 (CH)                         | 3.34-3.38; m                               | 2'',5'',6''                      |
| 5''                   | 69.8 (CH)                         | 3.62-3.66; m                               | 3''                              |
| 6''                   | 18.2 (CH <sub>3</sub> )           | 1.25; d, J=6.1 Hz                          | 4'',5''                          |

<sup>a</sup> Solvent: CD<sub>3</sub>OD; TMS ( $\delta$  = 0.00 ppm) for <sup>1</sup>H, CD<sub>3</sub>OD ( $\delta$  = 49.00 ppm) for <sup>13</sup>C; <sup>1</sup>H observation frequency 600.1 MHz.

<sup>b</sup> For numbering of the carbon atoms, see the formula, assignment of C-H via HSQC data.

<sup>c</sup> For CH<sub>2</sub> groups with diastereotopic protons a and b indicate the deshielded and shielded nucleus, respectively.

<sup>d</sup> Entries in the column HMBC indicate <sup>1</sup>H nuclei showing long-range correlations (<sup>2,3</sup>J) with the <sup>13</sup>C chemical shift in the second column.

n hydrogen number

q quarternary carbon

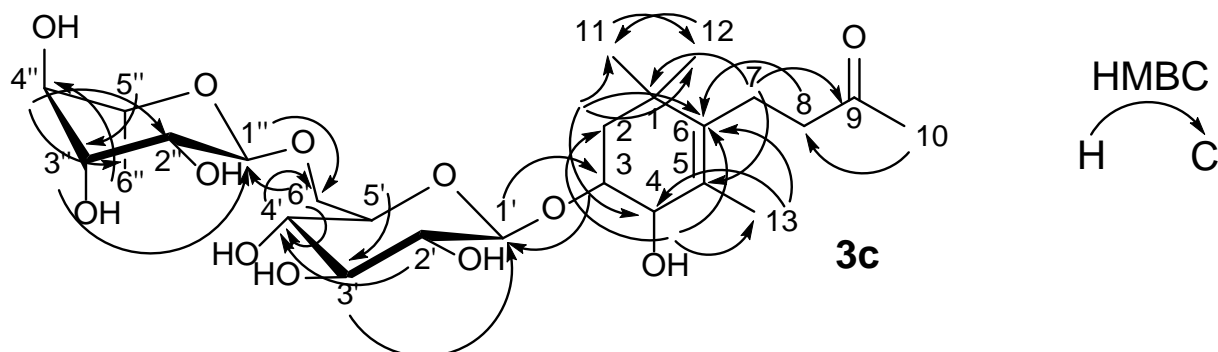**Figure S5.** Structure relevant long-range HC-correlation signals observed in the HMBC of **3c**

## References

Berthod, A.; Friesen, J.B.; Inui, T.; Pauli, G.F. Elution-extrusion countercurrent chromatography: theory and concepts in metabolic analysis, *Anal. Chem.* **2007**, 79, 3371-3382.

Ito, Y. Golden rules and pitfalls in selecting optimum conditions for high-speed countercurrent chromatography. *J. Chromatogr. A* **2005**, 1065, 145-168.

Stahl, E.; Kaltenbach, U. Dünnschichtchromatographie: VI. Mitteilung. Spurenanalyse von Zuckergemischen auf Kieselgur G-Schichten. *J. Chromatogr. A* **1961**, 5, 351-355.
